# Supplementary material for: Lithium adsorption and migration in group IV–VI compounds and GeS/graphene heterostructures: a comparative study
Source: Royal Society of Chemistry journal article supplement (doi:10.1039/c8cp00805a), 2018-01-01
Supplement: c8cp00805a1.pdf [file c8cp00805a1.pdf]

## Supplementary Information

The Lithium adsorption and migration in group IV-VI compounds and  
GeS/graphene heterostructure: a comparative study

Kuan-Rong Hao,<sup>a</sup> Lincan Fang,<sup>a</sup> Qing-Bo Yan,<sup>\*a</sup> and Gang Su<sup>\*b, c</sup>

<sup>a</sup> College of Materials Science and Opto-Electronic Technology, University of Chinese Academy of Sciences, Beijing 100049, China. E-mail: yan@ucas.ac.cn

<sup>b</sup> School of Physical Science, University of Chinese Academy of Sciences, Beijing 100049, China. E-mail: gsu@ucas.ac.cn

<sup>c</sup> Kavli Institute for Theoretical Sciences, University of Chinese Academy of Sciences, Beijing 100190, China.

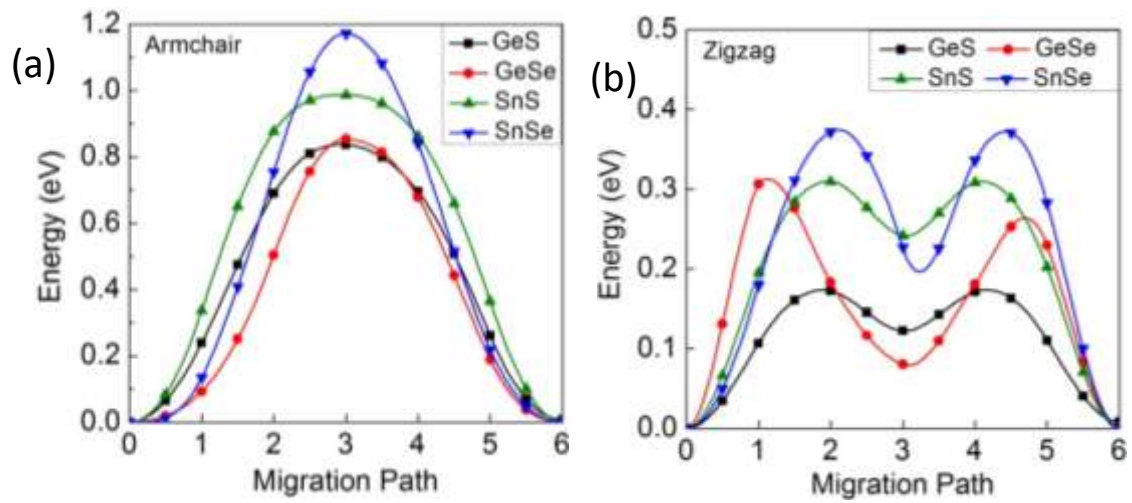

**Fig. S1** (a) (b) Energy profiles of Li diffusion along armchair and zigzag directions on monolayer MX, respectively.

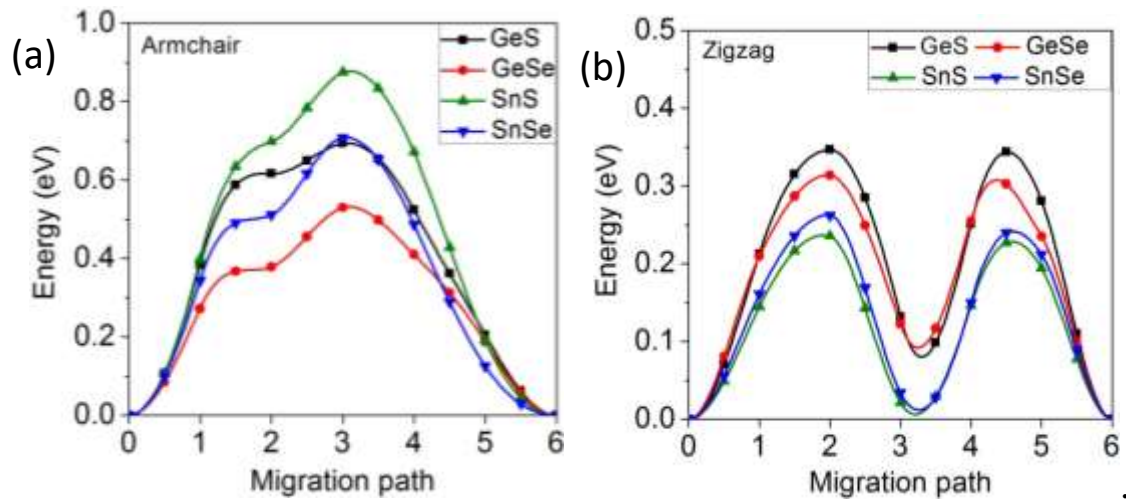

**Fig. S2** (a) (b) Energy profiles of Li diffusion along armchair and zigzag directions in bulk MX, respectively.

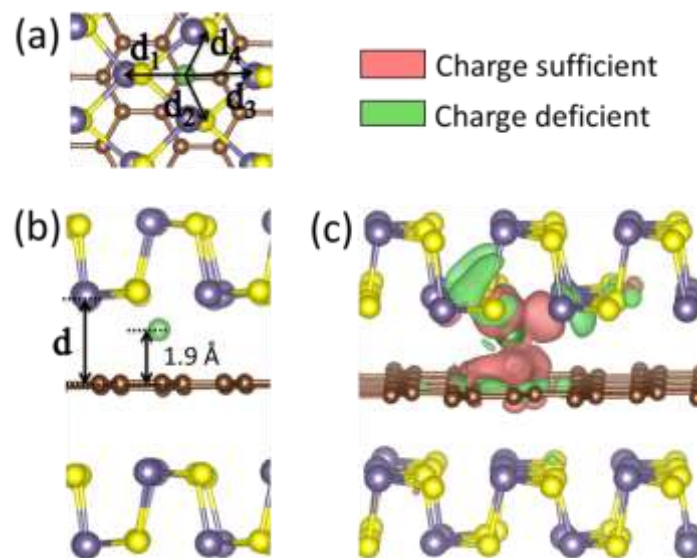

**Fig. S3** (a) (b) top and side views of Li-adsorbed GeS/Graphene; (c) Differential charge density (isovalue =  $0.001 \text{ e}/\text{bohr}^3$ ) between Li and GeS/Graphene.
